# Supplementary material for: Sub-second dynamics of theta-gamma coupling in hippocampal CA1
Source: eLife journal article supplement (doi:10.7554/elife.44320), 2019-07-29
Supplement: supp [file elife-44320-supp-v1.zip]

Archive with 16 entries (16 files):
- elife_poa_e44320_Figure_2_figure_supplement_4.ai
- elife_poa_e44320_Figure_5_figure_supplement_1.ai
- elife_poa_e44320_Figure_2_figure_supplement_3.ai
- elife_poa_e44320_Figure_1_figure_supplement_2.ai
- elife_poa_e44320_Supplementary_file_1.docx
- elife_poa_e44320_Figure_1_figure_supplement_6.ai
- elife_poa_e44320_Figure_1_figure_supplement_4.ai
- elife_poa_e44320_Transparent_Reporting_File.pdf
- elife_poa_e44320_Figure_2_figure_supplement_1.ai
- elife_poa_e44320_Figure_1_figure_supplement_1.ai
- elife_poa_e44320_Figure_1_figure_supplement_5.ai
- elife_poa_e44320_Figure_2_figure_supplement_2.ai
- elife_poa_e44320_Figure_5_figure_supplement_4.ai
- elife_poa_e44320_Figure_5_figure_supplement_3.ai
- elife_poa_e44320_Figure_5_figure_supplement_2.ai
- elife_poa_e44320_Figure_1_figure_supplement_3.ai
